# Supplementary material for: De novo assembly and sex-specific transcriptome profiling in the sand fly Phlebotomus perniciosus (Diptera, Phlebotominae), a major Old World vector of Leishmania infantum
Source: PubMed Central journal article supplement (PMC4619268; doi:10.1186/s12864-015-2088-x), 2015-10-23
Supplement: 12864_2015_2088_MOESM16_ESM.pdf [file 12864_2015_2088_MOESM16_ESM.pdf]

**PpeFemale4** (Cluster-7890.0--c24385.g4.i1)

F4F GGTCCATATTTGCTCTTTATTCATTCACTCATCTTTTACATTATATTGAA  
F4M GGTCCATATTTGCTCTTTATTCATTCACTCATCTTTTACATTATATTGAA

F4F AGACGTTCAACTTTATTTCTAATAAAAATGCAGTTTTCTAAGATCTTCATC  
F4M AGACGTTCAACTTTATTTCTAATAAAAATGCAGTTTTCTAAGATCTTCATC

F4F TGGTCCATGTTCCCTCTTCATCGTTTTTGCTTCGGTTGAAG-----  
F4M TGGTCCATGTTCCCTCTTCATCGTTTTTGCTTCGGTTGAAGGTAAGGTATT

F4F -----CA  
F4M TGATTTTAAATGTTTTGATAATTAAGGTAATTGTTTTATGTTAATCAGCA

F4F AGTTCAGTAAGTCAGCCAAATCCGAGCTCAGCCATCCAGTCCTAGGACC  
F4M AGTTCAGTAAGTCAGCCAAATCCGAGCTCAGCCATCCAGTCCTAGGACC

F4F CCGAAGACCACCATGTAATGAGGACCGATGCAAAAGGTTTTGCAGTCATT  
F4M CCGAAGACCACCATGTAATGAGGACCGATGCAAAAGGTTTTGCAGTCATT

F4F TGAACCGTGAAGGAAAAATGTATTAATAACAGGTGTTTCTGCTTGAAACGT  
F4M TGAACCGTGAAGGAAAAATGTATTAATAACAGGTGTTTCTGCTTGAAACGT

F4F AATAACCGGGATATGGCGAAGGTTAAACCAAACCATTCAGAATTGCCTGA  
F4M AATAACCGGGATATGGCGAAGGTTAAACCAAACCATTCAGAATTGCCTGA

F4F AATGGTCAACGAGGCCAGTAAATATGTAATTTAAATGACTTCATCGCTT  
F4M AATGGTCAACGAGGCCAGTAAATATGTAATTTAAATGACTTCATCGCTT

F4F GA  
F4M GA

**PpeMale5a** (Cluster-10369.0--c19338.g1.i1)

M5aM CAAATTTAATTTCCATACAAAATATATATAGAGTCTCACTTGAACGTTCCT  
M5aF CAAATTTAATTTCCATACAAAATATATATAGAGTCTCACTTGAACGTTCCT

M5aM TTAGTTTCATGAAGAAATTTGTGAAAATGAAGATCTTTCTATTGACTTTGT  
M5aF TTAGTTTCATGAAGAAATTTGTGAAAATGAAGATCTTTCTATTGACTTTGT

M5aM TTGCCCTCCTAATCATTTGGAGGAATGGAAGGAACAGATGCGGTTGCTGAA  
M5aF TTGCCCTCCTAATCATTTGGAGGAATGGAAGGAACAGATGCGGTTGCTGAA

M5aM GGCGAATCGACGGGATGTATAATGTGTCCAGAGTCGTCTTTAGATGGTGG  
M5aF GGCGAATCGACGGGATGTATAATGTGTCCAGAGTCGTCTTTAGATGGTGG

M5aM AAACGAAAATG-----  
M5aF AAACGAAAATGGTAAGAATTAATAAAAAAAAAATCTTTTTATTTGTTTGTGAA

M5aM -----  
M5aF AATTTTGATTATTTTTTGTGCCTGATAAAAAATTCCTGTACCGGGAATCGAA

M5aM -----  
M5aF CCCGGGGCATTTCAAATCCGATGAAAGGTTTTTAATACGTTCAACCCAGG

M5aM -----  
M5aF TTCGAATCCCAATAGATTTTTTCGGGTTTAATAATCGCCTGAACTAACTT

M5aM -----  
M5aF AAAAAAATATTTTTTATCTTAGAAGAAAAAGAAATGAAACAGTTTTTGGATG

M5aM -----  
M5aF ATGAAAGCGATGGTGGTGTGAATTTAAAAATTTCTAACACTGTTTTATTTTG

M5aM -----TTATGAGGACTCAAAGACATGTTCCAAATAATCCG  
M5aF TAATTTTCTTTACAGTTATGAGGACTCAAAGACATGTTCCAAATAATCCG

M5aM CCGGCACCTGCACCGGCTCCAAAACCCATTGGATAAAGTGCAAATTTATCA  
M5aF CCGGCACCTGCACCGGCTCCAAAACCCATTGGATAAAGTGCAAATTTATCA

M5aM CGTTGGAAATGTTAGTAATACCTAATGTGATTTGACTTCCCGATCAAATA  
M5aF CGTTGGAAATGTTAGTAATACCTAATGTGATTTGACTTCCCGATCAAATA

M5aM AAGGGGATGCCCTTTAACAGTCGTTCGTTAACATTTCCCTACACAACAAGAAT  
M5aF AAGGGGATGCCCTTTAACAGTCGTTCGTTAACATTTCCCTACACAACAAGAAT

M5aM TATTTTGTGTGAAAAAGAAAAATGAAAAATTTTCATCAATAAATGCATT  
M5aF TATTTTGTGTGAAAAAGAAAAATGAAAAATTTTCATCAATAAATGCATT

M5aM TAATGATGGAAAAAAAAAAAAA  
M5aF TAATGATGGAAAAAAAAAAAAA

**PpeMale8** (Cluster-14619.0--c18223.g1.i1)

M8M CTTTCTAGTAGTTTGTTCATCAAGTTCCAAAAGTGAATATGAATATTTTTG  
M8F CTTTCTAGTAGTTTGTTCATCAAGTTCCAAAAGTGAATATGAATATTTTTG

M8M CTGTAGGAATATTCTTATTGATGTTATTCAGAATAGGAGGATGCTCGAAT  
M8F CTGTAGGAATATTCTTATTGATGTTATTCAGAATAGGAGGATGCTCGAAT

M8M CTAATCAGAG-----  
M8F CTAATCAGAGGTAGATATAAGATAATAAACTAATAATTCTTGATGGACGT

M8M -----ATCAATCACGCTTTACCAGACAAGATTTTT  
M8F CTAACAGCCTTTTATTTCAGATTCAATCACGCTTTACCAGACAAGATTTTT

M8M TTACCTCTGCAGTTCAACCACCTGACTATGATGATGGAACAGGAGGTCCA  
M8F TTACCTCTGCAGTTCAACCACCTGACTATGATGATGGAACAGGAGGTCCA

M8M AATGTGTATTATTTCAGTACCAGATGGCACTGAAATGCAGCCTTCACCAAT  
M8F AATGTGTATTATTTCAGTACCAGATGGCACTGAAATGCAGCCTTCACCAAT

M8M GATGCAACCAAGACGACAAGAGCAGCAATATCATCCATATGAAACGCCTT  
M8F GATGCAACCAAGACGACAAGAGCAGCAATATCATCCATATGAAACGCCTT

M8M ATCCAGATGATATTAGGCAACCACCTTCATATGAATTTTTGCCACCCCC  
M8F ATCCAGATGATATTAGGCAACCACCTTCATATGAATTTTTGCCACCCCC

M8M AGTGGTTGAAAATATTCGATCATTTTGAATGTTTTACCACCAATAAAAAA  
M8F AGTGGTTGAAAATATTCGATCATTTTGAATGTTTTACCACCAATAAAAAA

M8M GACAAAATAAAAAAGACGAAATCTCGACCGTTCGTA ACTCCAGGGGTCCA  
M8F GACAAAATAAAAAAGACGAAATCTCGACCGTTCGTA ACTCCAGGGGTCCA

M8M AAA  
M8F AAA

**PpeMale15** (Cluster-18862.0\_c3474\_g1\_i1)

M15M AATAAACTTGTGATCGATTGATCTTTAAACATTGTGAAAATGAATTTTCA  
M15F AATAAACTTGTGATCGATTGATCTTTAAACATTGTGAAAATGAATTTTCA

M15M TCTAGTACTAGCAGGAGTTTTCTTAGTGATGTTCTTTGGATCAG-----  
M15F TCTAGTACTAGCAGGAGTTTTCTTAGTGATGTTCTTTGGATC**AGGTAAAC**

M15M -----  
M15F TATTAGATTCAATAATAATTCCATTTCCCACTTAATATCCTGTCAAATAC

M15M -----GACATTGCTCAGATGAACTTCGAGATGAATCCCGTCTTCCCA  
M15F **TTATCCAGG**AACATTGCTCAGATGAACTTCGAGATGAATCCCGTCTTCCCA

M15M GATCTGCTTTTGCATCCCCACAAGATTATGGACAATATCCGGAAGTATAT  
M15F GATCTGCTTTTGCATCCCCACAAGATTATGGACAATATCCGGAAGTATAT

M15M GCACAATATTACCCGGCCGTAGATCCACAAAATCCGGGATATAACCATTCA  
M15F GCACAATATTACCCGGCCGTAGATCCACAAAATCCGGGATATAACCATTCA

M15M GCCTGACCCCCCGCCGCCACAGTACGGTCATGGTATTTATCAATACGATT  
M15F GCCTGACCCCCCGCCGCCACAGTACGGTCATGGTATTTATCAATACGATT

M15M ACCCACTGAAAGGTCGTTGGAGGAAGTAAAAGAACTTGATTGAGAAATTG  
M15F ACCCACTGAAAGGTCGTTGGAGGAAGTAAAAGAACTTGATTGAGAAATTG

M15M AAAATCTGAGATTCTTATCCAGGATTTTGGACCTTTGCGGAATAATATTT  
M15F AAAATCTGAGATTCTTATCCAGGATTTTGGACCTTTGCGGAATAATATTT

M15M CTTTTCTGCACGAAAAATAATTCAGCAAATAAAGGAACTTCAAACATTA  
M15F CTTTTCTGCACGAAAAATAATTCAGCAAATAAAGGAACTTCAAACATTA

M15M AAAAAAAAAA  
M15F AAAAAAAAAA

**PpeMale17** (Cluster-19669.0--c22663.g1.i6)

M1 7M CAACCAGAATTGTACAATAAGTATAACTAAACCCAAAACGCAGCATGAAAT  
M1 7F CAACCAGAATTGTACAATAAGTATAACTAAACCCAAAACGCAGCATGAAAT

M1 7M ATATTTTCATACTGACCATTTTTCAAATTATTTTCACAAAATACATATAC  
M1 7F ATATTTTCATACTGACCATTTTTCAAATTATTTTCACAAAATACATATAC

M1 7M CTAATATAAGTCTGATATGTCTTTAAGACATACAAAATTCTTCAATTTTG  
M1 7F CTAATATAAGTCTGATATGTCTTTAAGACATACAAAATTCTTCAATTTTG

M1 7M CTTGCTCAGTGAGAAAAGCTCTTATAATGTGTAGAATAGTTTTGGCAACA  
M1 7F CTTGCTCAGTGAGAAAAGCTCTTATAATGTGTAGAATAGTTTTGGCAACA

M1 7M TCTACGAAATGGATTTTCGCGAAGTGCATACCGACTAGACCTGGATCCATT  
M1 7F TCTACGAAATGGATTTTCGCGAAGTGCATACCGACTAGACCTGGATCCATT

M1 7M CCTTAACGAACTACACAATATATTTTCATAAAGACCAATTAACCGCCTGAT  
M1 7F CCTTAACGAACTACACAATATATTTTCATAAAGACCAATTAACCGCCTGAT

M1 7M TTCATGTAATTACAAATTCAAATTAATAAATTTGATAAAACCTAATGTGAAT  
M1 7F TTCATGTAATTACAAATTCAAATTAATAAATTTGATAAAACCTAATGTGAAT

M1 7M TTCTAGTATAAAAAACTTCTAGGAGTACAACTCAAGTGATTTTCACAC  
M1 7F TTCTAGTATAAAAAACTTCTAGGAGTACAACTCAAGTGATTTTCACAC

M1 7M AAATTTTCACTAGATTTTGACTAATGGTTGGTACATTCAAGAGTTTCAAC  
M1 7F AAATTTTCACTAGATTTTGACTAATGGTTGGTACATTCAAGAGTTTCAAC

M1 7M TGAAGTCAAAAATGAAAAGGTCTTTTAGCAGTGATTCTGTTGATTAACATTT  
M1 7F TGAAGTCAAAAATGAAAAGGTCTTTTAGCAGTGATTCTGTTGATTAACATTT

M1 7M TGGGACAAA-----  
M1 7F TGGGACAAAAGTAAGTTCAAAAATATTCACAAATAAACAATATTCTTTTACC

M1 7M -----GTCAATGCGAGCCTCGAGAT  
M1 7F TATAATAAATATTTTATTTATATTAATAATCAGGTCAATGCGAGCCTCGAGAT

M1 7M TGGCCACATGTTAGTCAACAATCCTCGTCCCAAAACAGGATTGACAGTTC  
M1 7F TGGCCACATGTTAGTCAACAATCCTCGTCCCAAAACAGGATTGACAGTTC

M1 7M ATTCGTTGGATGTGGTCCTGATTGTGAAAATCGTCCACCACCAGGTGGTA  
M1 7F ATTCGTTGGATGTGGTCCTGATTGTGAAAATCGTCCACCACCAGGTGGTA

M1 7M GGCCGCGGCCACCACCAGGTGGTAGACCGCGGCCACCACCAGGTGGTTAT  
M1 7F GGCCGCGGCCACCACCAGGTGGTAGACCGCGGCCACCACCAGGTGGTTAT

M1 7M CCGTGGCCACCCTCACCACCAACTCCACCAAGACCACCCTAGGACAACC  
M1 7F CCGTGGCCACCCTCACCACCAACTCCACCAAGACCACCCTAGGACAACC

M1 7M AGCATGCTATCCAGCATGCTGTGTGCTTATGCCATGCTATCCCGGCTAAC  
M1 7F AGCATGCTATCCAGCATGCTGTGTGCTTATGCCATGCTATCCCGGCTAAC

M1 7M CGTTATTAATCCAAATTTGTTAAAGAAAATTTATTTCAAAATAAAGAAAGA  
M1 7F CGTTATTAATCCAAATTTGTTAAAGAAAATTTATTTCAAAATAAAGAAAGA

M1 7M TTCCCCGAAAAGCTGATCTGCAAAAATTCCTAAATAAAAAAAAAAAAAA  
M1 7F TTCCCCGAAAAGCTGATCTGCAAAAATTCCTAAATAAAAAAAAAAAAAA
